# Supplementary material for: Fluorescence light-up AIE probe for monitoring cellular alkaline phosphatase activity and detecting osteogenic differentiation
Source: Royal Society of Chemistry journal article supplement (doi:10.1039/c6tb00828c), 2016-01-01
Supplement: c6tb00828c1.pdf [file c6tb00828c1.pdf]

**Electronic Supplementary Information**

*of*

**Fluorescence light-up AIE probe for monitoring cellular alkaline  
phosphatase activity and detecting osteogenic differentiation**

Feng-Yi Cao, Yue Long, Shi-Bo Wang, Bin Li, Jin-Xuan Fan, Xuan Zeng\* and Xian-  
Zheng Zhang\*

Key Laboratory of Biomedical Polymers of Ministry of Education & Department of  
Chemistry, Wuhan University, Wuhan 430072, China

\* To whom correspondence should be addressed. Tel. & Fax: 86-27-68754509.

E-mail addresses: zeng\_xuan@163.com (X. Zeng), xz-zhang@whu.edu.cn (X. Z.  
Zhang).

Table 1 The maximum excitation and emission wavelengths of TPE-PA, TPE-2PA, TPE-4PA and after incubated with ALP.

| Samples              | $\lambda_{\text{ex}}$ | $\lambda_{\text{em}}$ |
|----------------------|-----------------------|-----------------------|
| TPE-PA               | 338                   | 469                   |
| TPE-2PA              | 337                   | 457                   |
| TPE-4PA              | 337                   | 469                   |
| TPE-PA+ALP (5 min)   | 347                   | 469                   |
| TPE-2PA+ALP (5 min)  | 346                   | 459                   |
| TPE-4PA+ALP (5 min)  | 342                   | 466                   |
| TPE-PA+ALP (60 min)  | 342                   | 459                   |
| TPE-2PA+ALP (60 min) | 347                   | 449                   |
| TPE-4PA+ALP (60 min) | 349                   | 441                   |

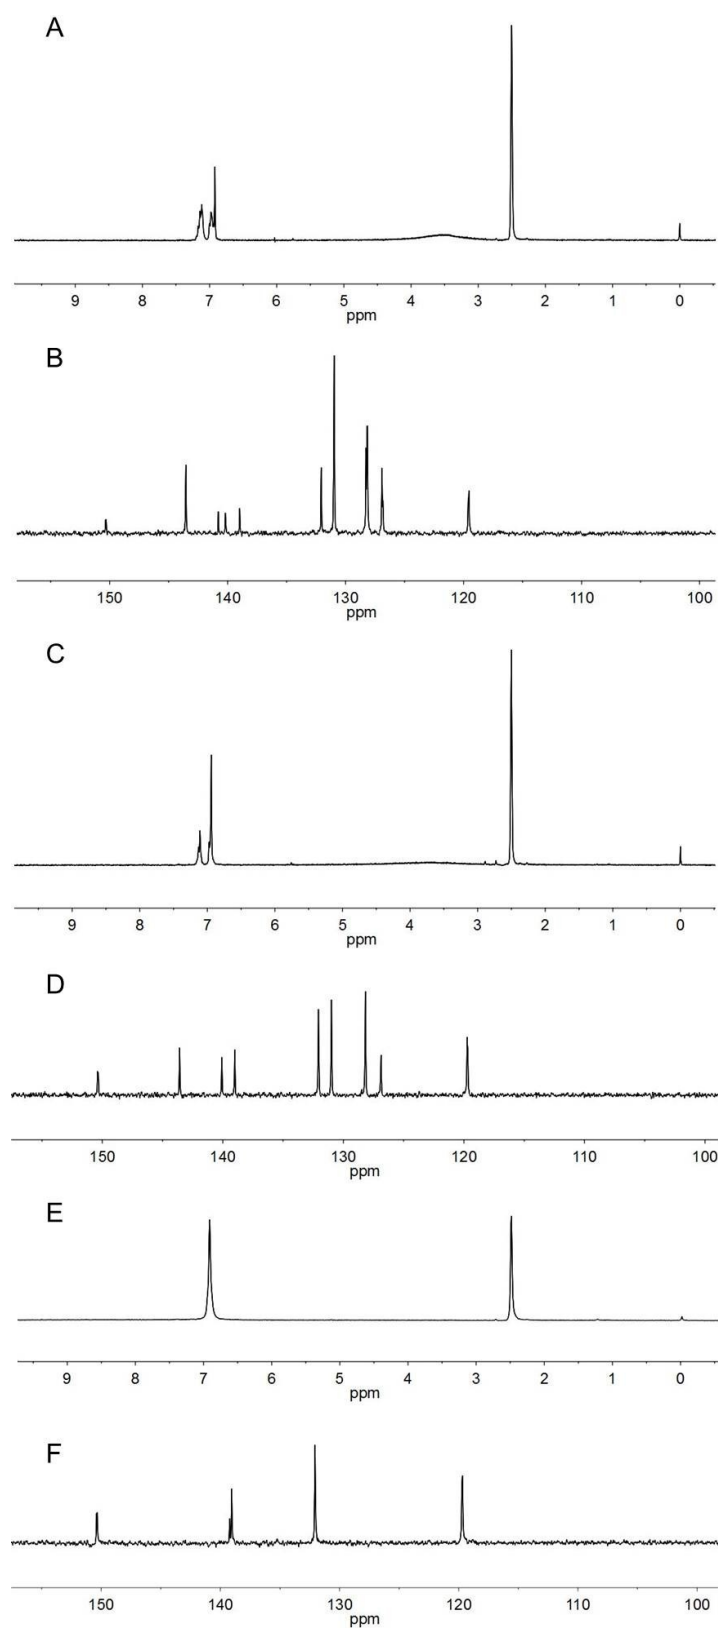

Fig. S1  $^1\text{H}$  NMR of (A) TPE-PA, (C) TPE-2PA and (E) TPE-4PA;  $^{13}\text{C}$  NMR of (B) TPE-PA, (D) TPE-2PA and (F) TPE-4PA.

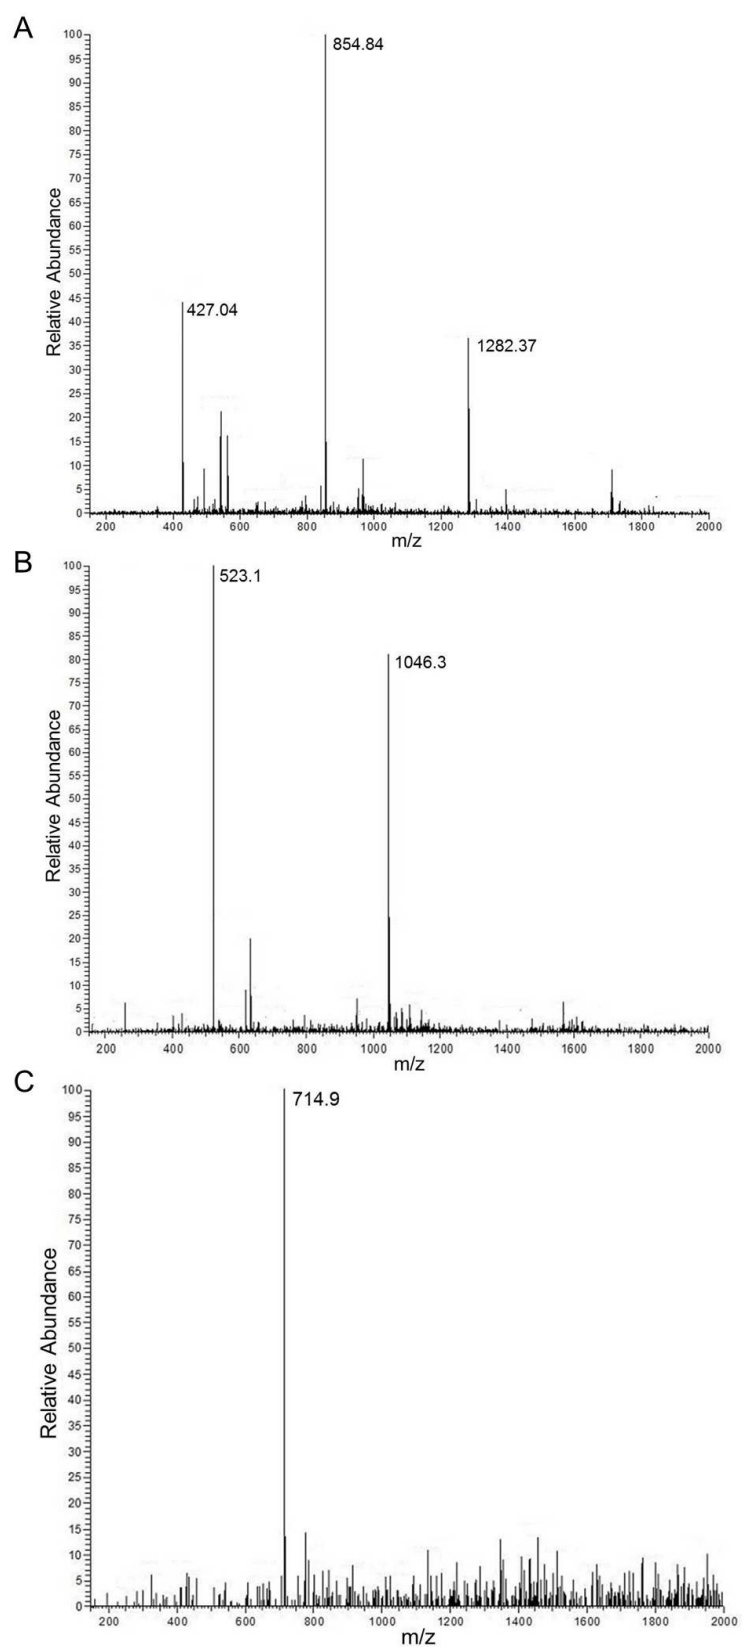

Fig. S2 ESI-MS of (A) TPE-PA, (B) TPE-2PA and (C) TPE-4PA.

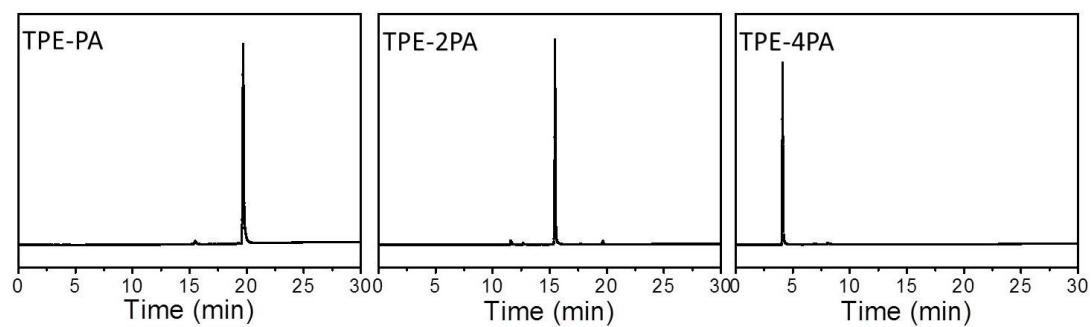

Fig. S3 HPLC traces of TPE-PA, TPE-2PA and TPE-4PA dissolved in methanol.

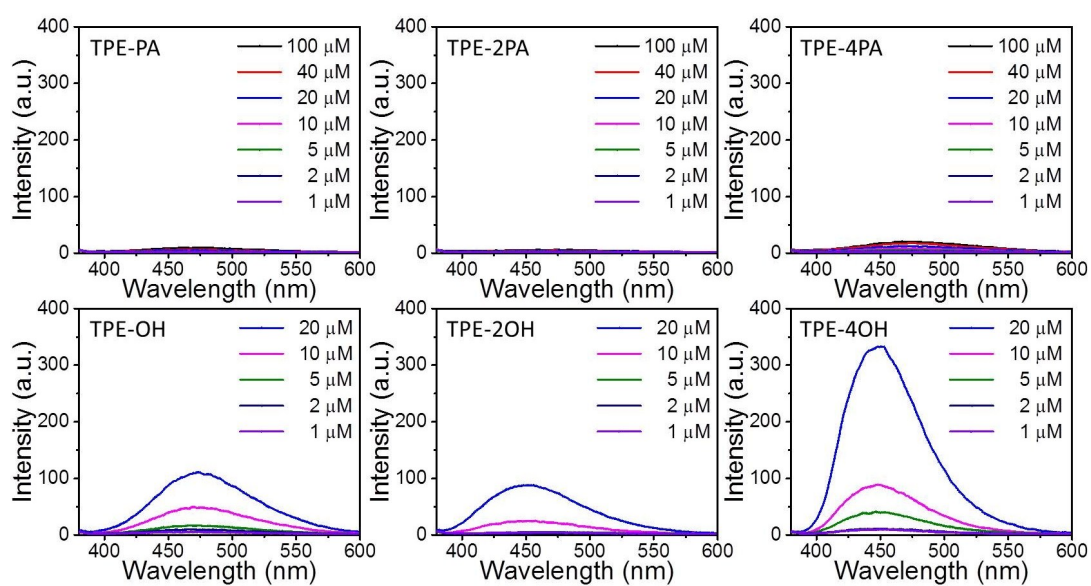

Fig. S4 The fluorescence spectra of TPE-PA, TPE-2PA and TPE-4PA in Tris- HCl buffer at different concentrations (1-100  $\mu\text{M}$ ) and TPE-OH, TPE-2OH and TPE-4OH in DMSO/Tris-HCl buffer ( $v/v = 1/200$ ) at different concentraions (1-20  $\mu\text{M}$ ).

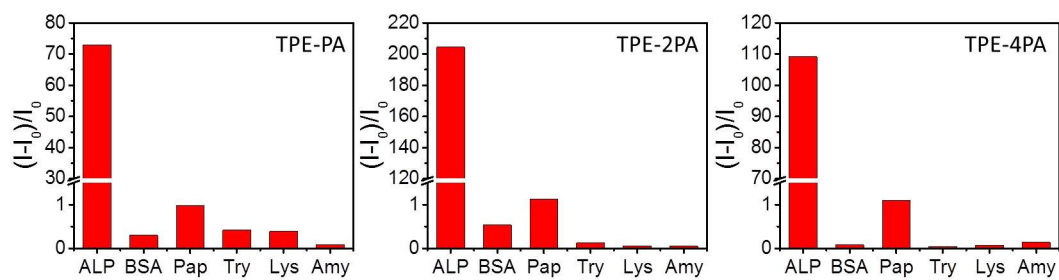

Fig. S5 Plot of  $(I - I_0)/I_0$  versus different proteins, where  $I$  and  $I_0$  are the fluorescence intensities of TPE-PA, TPE-2PA, TPE-4PA alone and that of TPE-PA, TPE-2PA, TPE-4PA incubated with different proteins.  $[TPE-PA] = [TPE-2PA] = [TPE-4PA] = 10 \mu M$ ,  $\lambda_{ex} = 335 \text{ nm}$ .

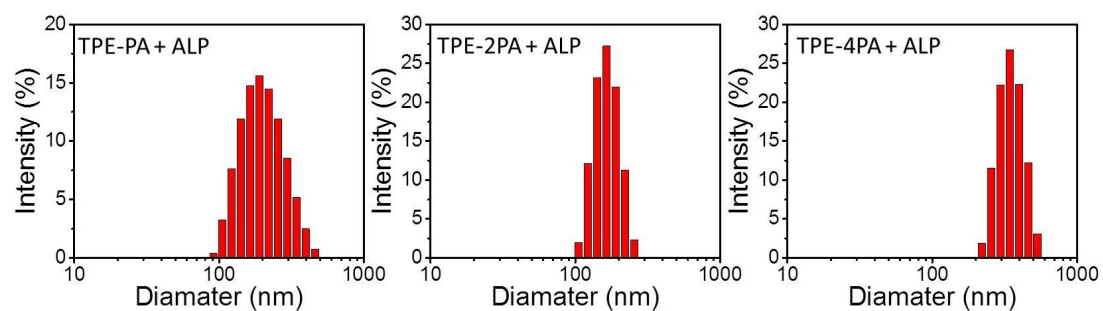

Fig. S6 Dynamic light scattering (DLS) results for the solution of TPE-PA, TPA-2PA incubated with ALP for 5 min and TPE-4PA incubated with ALP for 60 min. [TPE-PA] = [TPE-2PA] = [TPE-4PA] = 40  $\mu$ M; [ALP] = 160 mU.

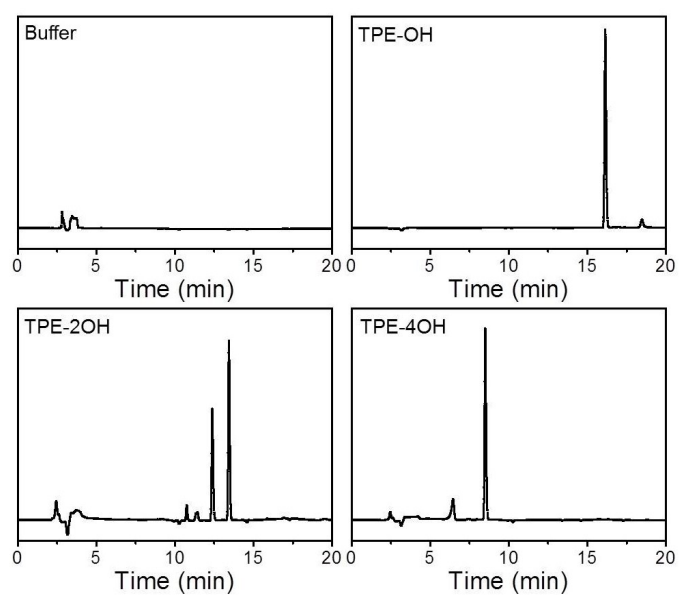

Fig. S7 HPLC traces of Tris-HCl buffer, and TPE-OH, TPE-2OH, TPE-4OH in Tris-HCl buffer.

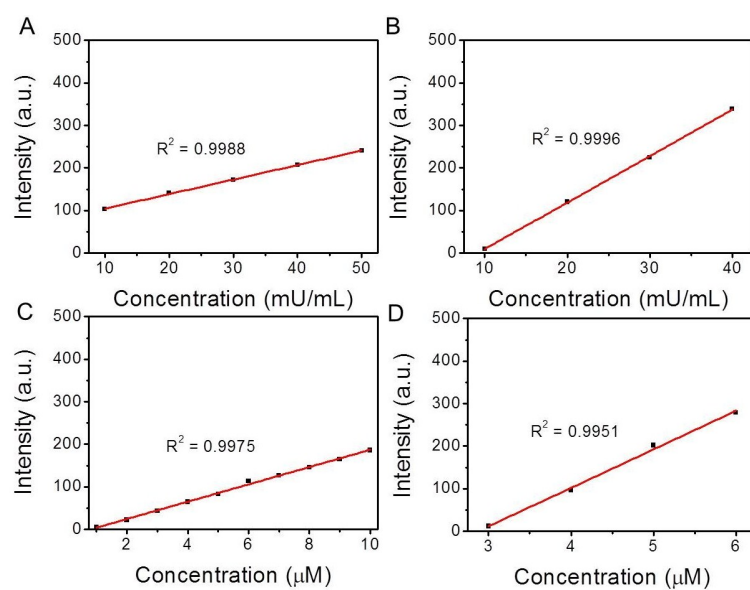

Fig. S8 The linear relations: (A) the fluorescence intensity of TPE-PA with different concentrations of ALP (10-50 mU); (B) the fluorescence intensity of TPE-2PA with different concentrations of ALP (10-50 mU); (C) the fluorescence intensity of TPE-PA with different concentrations of the probe (1-10  $\mu\text{M}$ ); (D) the fluorescence intensity of TPE-2PA with different concentrations of the probe (3-6  $\mu\text{M}$ ).

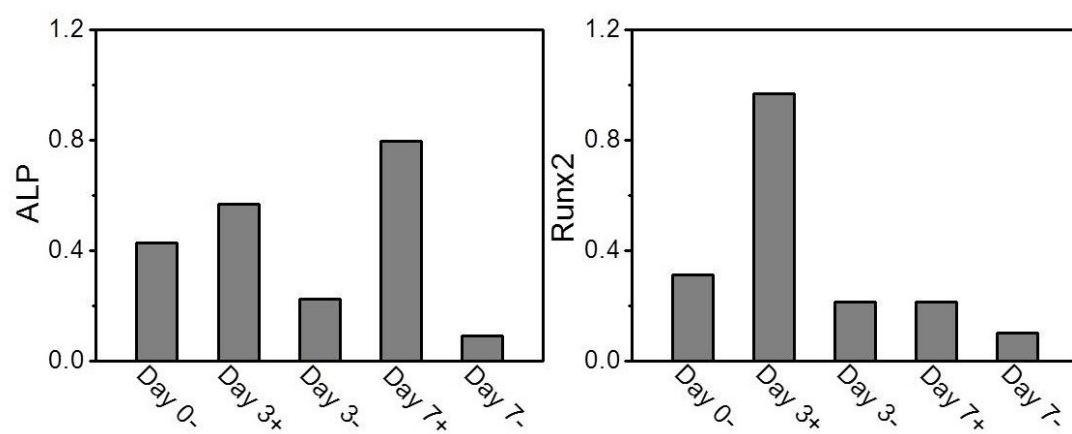

Fig. S9 Quantitative analysis of the light intensities of ALP and Runx2 protein expressions as the ratio to GAPDH.

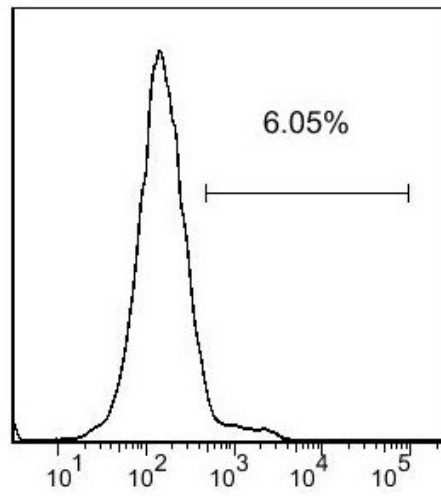

Fig. S10 The flow cytometry analysis of the non-treated cells as negative control.
